# Supplementary material
Source: PubMed Central journal article supplement (PMC3878184)
Supplement: NIHMS539343-supplement-supporting_information.pdf [file NIHMS539343-supplement-supporting_information.pdf]

Supplementary Information for “Characterization of Monomeric MnII/III/IV-Hydroxo Complexes from X- and Q-band Dual Mode EPR Spectroscopy.”

Rupal Gupta, Taketo Taguchi, A.S. Borovik, and Michael P. Hendrich

**Table S1:** Covalency factors,  $\gamma_d$ , used in D-value calculation

| d-orbital | Formal $N_d$ | Mulliken $N_d^a$ | $\gamma_d^b$       |
|-----------|--------------|------------------|--------------------|
| $z^2$     | 0            | 1.019            | $(2 - N_d)/2$ 0.49 |
| xy        | 1            | 1.088            | $2 - N_d$ 0.91     |
| $x^2-y^2$ | 1            | 0.943            | $2 - N_d$ 1.06     |
| xz        | 1            | 1.070            | $2 - N_d$ 0.93     |
| yz        | 1            | 0.818            | $2 - N_d$ 1.18     |

a: Obtained from DFT calculation of the  $Mn^{III}$ -OH ground state

b: Calculated using the Mulliken spin population.

**Table S2:** Comparison of calculated values of selected bond distances ( $\text{\AA}$ ) of  $M^{n+}$ -OH complexes.

| Complex        | S   | M-OH  | M- $N_{eq1}$ | M- $N_{eq2}$ | M- $N_{eq3}$ | Avg. M- $N_{eq}$ | M- $N_{ax}$ |
|----------------|-----|-------|--------------|--------------|--------------|------------------|-------------|
| $Mn^{II}$ -OH  | 5/2 | 2.101 | 2.147        | 2.159        | 2.175        | 2.160            | 2.427       |
| $Mn^{III}$ -OH | 2   | 1.872 | 2.033        | 2.066        | 2.072        | 2.057            | 2.058       |
| $Mn^{IV}$ -OH  | 3/2 | 1.838 | 1.927        | 1.929        | 1.946        | 1.934            | 2.048       |
| $Fe^{III}$ -OH | 5/2 | 1.938 | 1.997        | 1.990        | 2.015        | 1.975            | 2.365       |

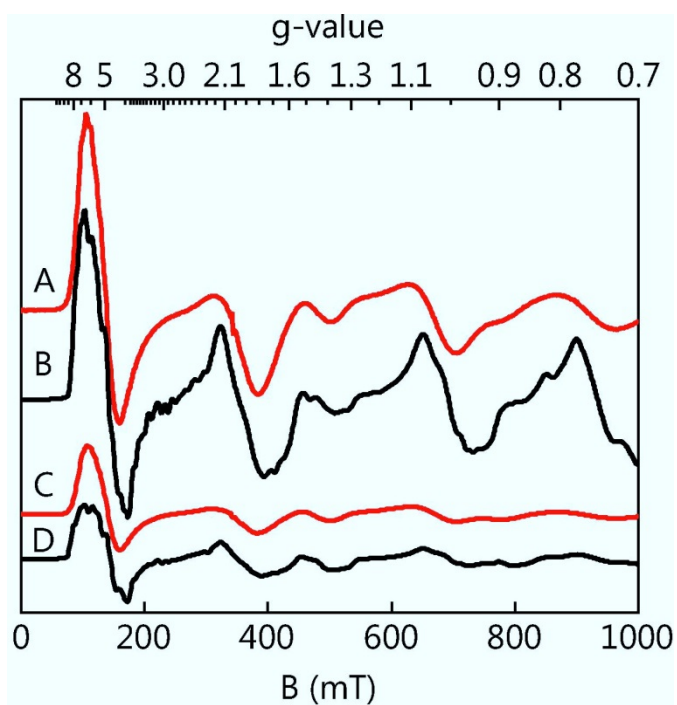

**Figure S1.** X-band EPR spectra (colored) and simulations (black) of the  $\text{Mn}^{\text{II}}\text{-OH}$  complex, 5mM in DMF/THF with  $B_1 \perp B$ , (A) 2K, (C) 10K . Experimental condition: temperature 10 K, power 0.02 mW (A), 0.2mW (C), frequency 9.634 GHz. The simulation parameters are in Table 1.

Full Reference 25: Frisch, M. J.; Trucks, G. W.; Schlegel, H. B.; Scuseria, G. E.; Robb, M. A.; Cheeseman, J. R.; J. A. Montgomery, J.; Vreven, T.; Kudin, K. N.; Burant, J. C.; Millam, J. M.; Iyengar, S. S.; Tomasi, J.; Barone, V.; Mennucci, B.; Cossi, M.; Scalmani, G.; N. Rega; Petersson, G. A.; Nakatsuji, H.; Hada, M.; Ehara, M.; K. Toyota; Fukuda, R.; Hasegawa, J.; Ishida, M.; Nakajima, T.; Honda, Y.; Kitao, O.; Nakai, H.; Klene, M.; Li, X.; Knox, J. E.; Hratchian, H. P.; Cross, J. B.; Bakken, V.; Adamo, C.; Jaramillo, J.; Gomperts, R.; Stratmann, R. E.; Yazyev, O.; Austin, A. J.; Cammi, R.; Pomelli, C.; Ochterski, J. W.; Ayala, P. Y.; Morokuma, K.; Voth, G. A.; Salvador, P.; Dannenberg, J. J.; Zakrzewski, V. G.; Dapprich, S.; Daniels, A. D.; Strain, M. C.; Farkas, O.; Malick, D. K.; Rabuck, A. D.; K. Raghavachari; Foresman, J. B.; Ortiz, J. V.; Cui, Q.; Baboul, A. G.; Clifford, S.; Cioslowski, J.; Stefanov, B. B.; Liu, G.; Liashenko, A.; Piskorz, P.; Komaromi, I.; Martin, R. L.; Fox, D. J.; Keith, T.; Al-Laham, M. A.; Peng, C. Y.; Nanayakkara, A.; Challacombe, M.; Gill, P. M. W.; Johnson, B.; Chen, W.; Wong, M. W.; Gonzalez, C.; Pople, J. A. Wallingford CT 2004; Vol. Gaussian 03, Revision E.01.
